# Supplementary material for: Arginine methyltransferase PRMT5 is essential for sustaining normal adult hematopoiesis
Source: JCI journal article supplement (doi:10.1172/jci81749), 2015-08-10
Supplement: sd1 [file 1]

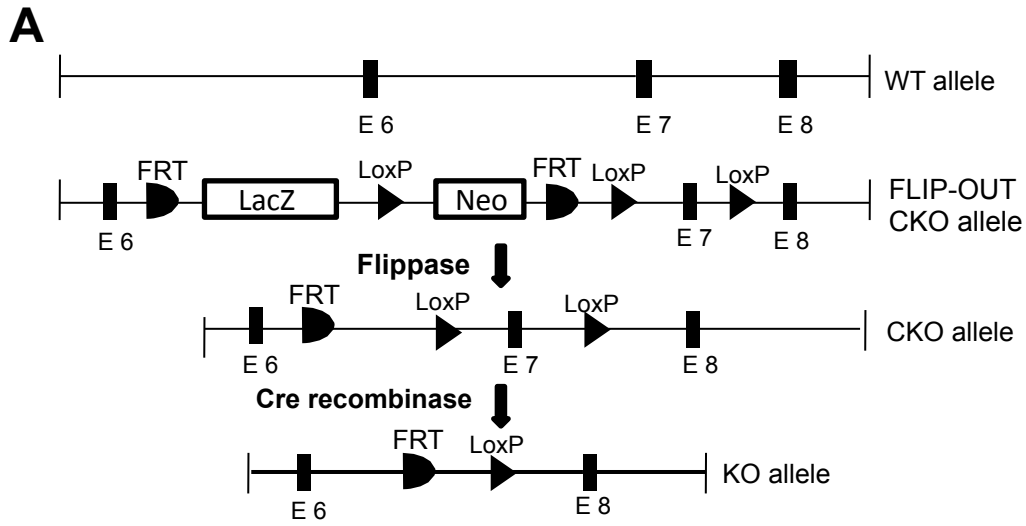**B**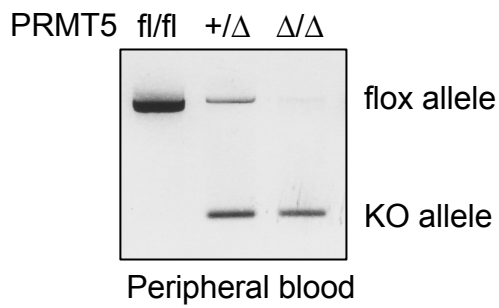**C**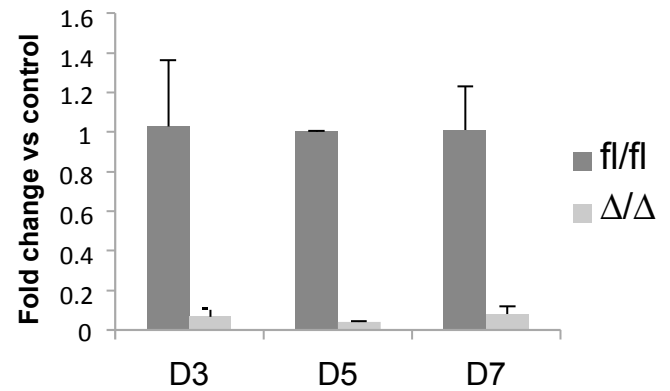**D**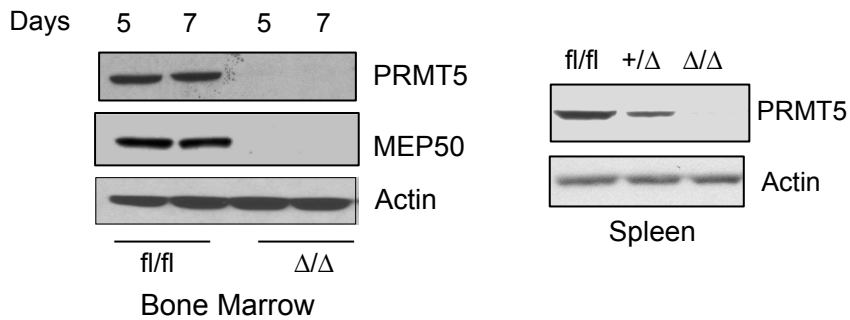

**Figure S1:** Generation of *Prmt5* conditional KO mice. **A)** Strategy used to generate *Prmt5* conditional KO mice. In the original version of the allele (FLIP-OUT CKO), gene function was inactivated by splicing the upstream endogenous exons to a splice acceptor site in the targeting cassette. To render this allele a conditional allele, the targeting cassette was removed using Flp recombinase, leaving loxP sites flanking a critical exon (exon 7, which encodes the catalytic domain of PRMT5). Mice homozygous for the *Prmt5* floxed allele were then crossed to *Mx1Cre* or *ERCre* transgenic mice to generate *Mx1Cre*<sup>+</sup> or *ERCre*<sup>+</sup>*PRMT5*<sup>fl/+</sup> mice (*ERCre*<sup>+</sup>*PRMT5*<sup>fl/fl</sup> mice were used for the experiments shown in Figure 5F). These mice were bred to homozygosity for the floxed *Prmt5* allele, but with only one copy of the *Mx1Cre* or *ERCre* transgene. **B)** Genomic DNA was purified from peripheral blood at 5 d.p.i. and PCR used to confirm the deletion of exon 7 of *Prmt5* in *Mx1Cre*<sup>+</sup>*Prmt5*<sup>fl/+</sup> and *Mx1Cre*<sup>+</sup>*Prmt5*<sup>fl/fl</sup> mice. **C)** Quantitative Real-time PCR demonstrates the loss of *Prmt5* mRNA in mouse bone marrow cells at 3, 5 and 7 d.p.i. The expression of *Prmt5* was normalized to *Hprt1*. **D)** Lack of PRMT5 and MEP50 proteins in mouse bone marrow and spleen cells was confirmed by western blot, 5 and 7 d.p.i.

**A**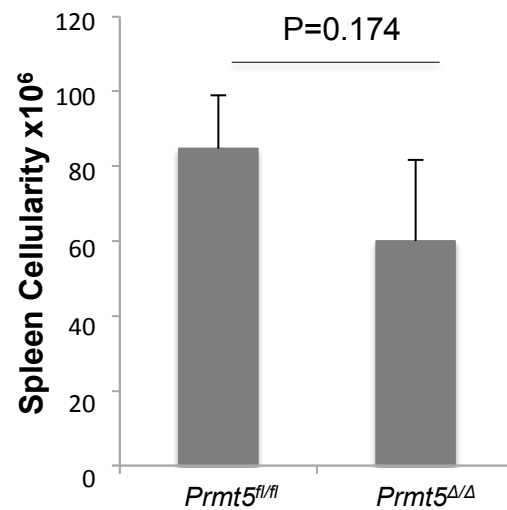**B**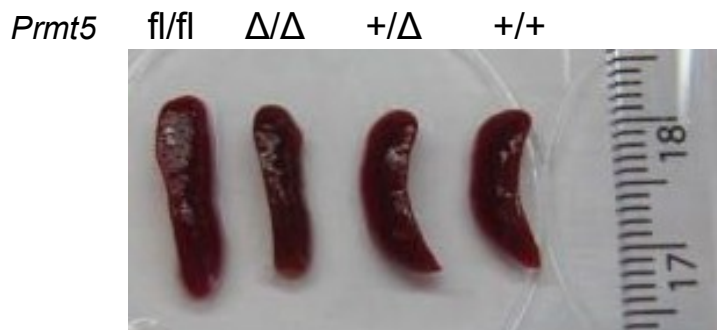

**Figure S2** Minimal effect of PRMT5 loss on spleen cellularity. A) Numbers of spleen cells isolated from *Prmt5* control and knockout mice 15 days post poly (I:C) injection are plotted (n=5). P value is calculated by student's *t*-test. B) a representative image of spleens isolated from day 15 *Prmt5* control and heterozygous/homozygous knockout mice.

**A**

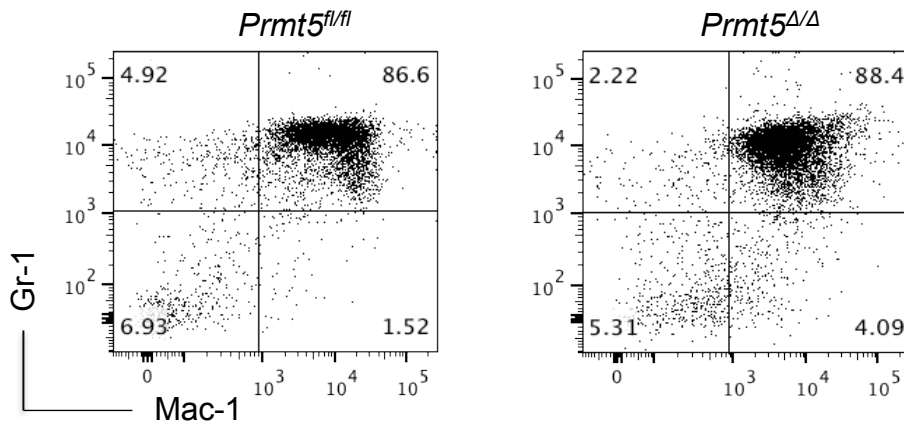

**B**

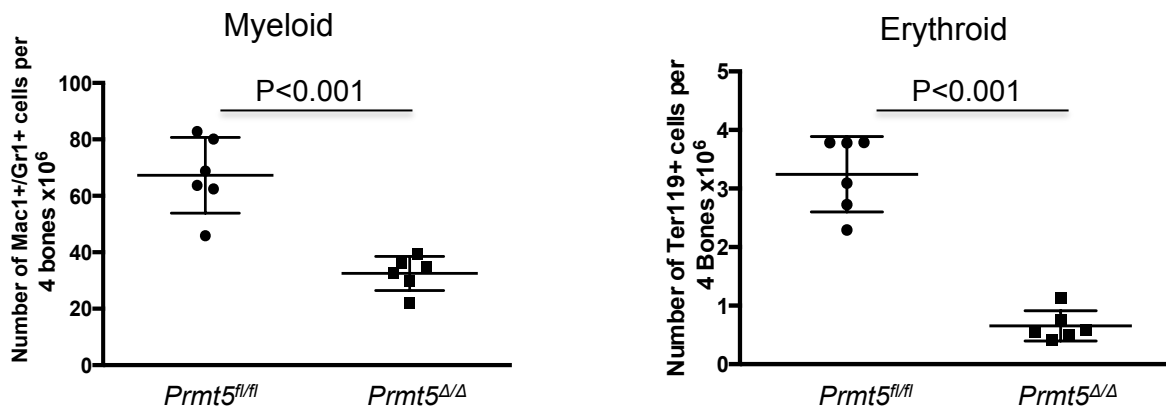

**C**

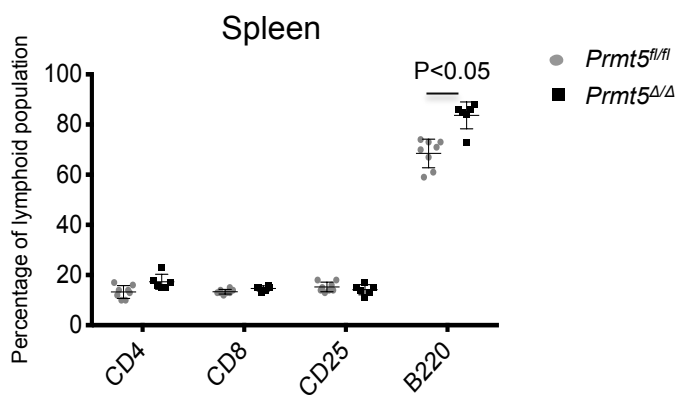

**D**

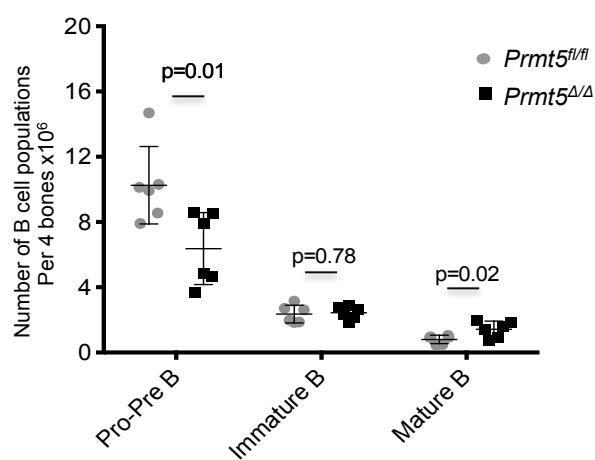

**E**

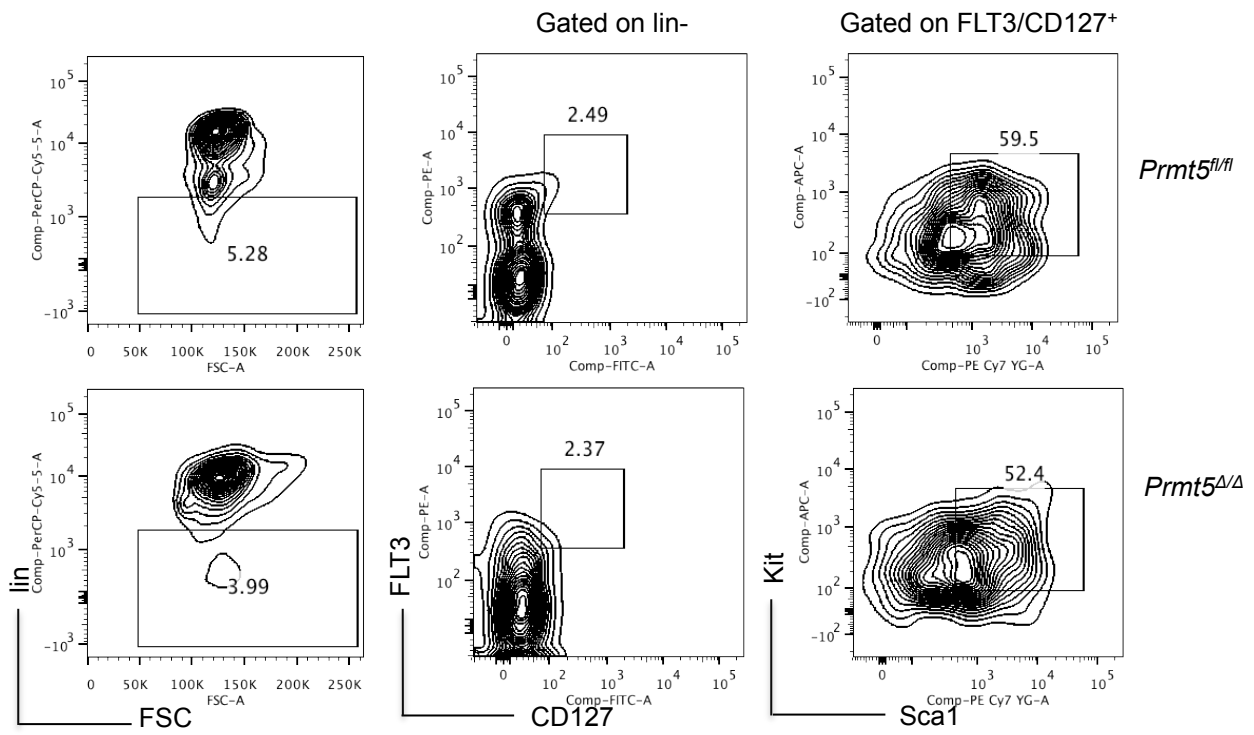

**F**

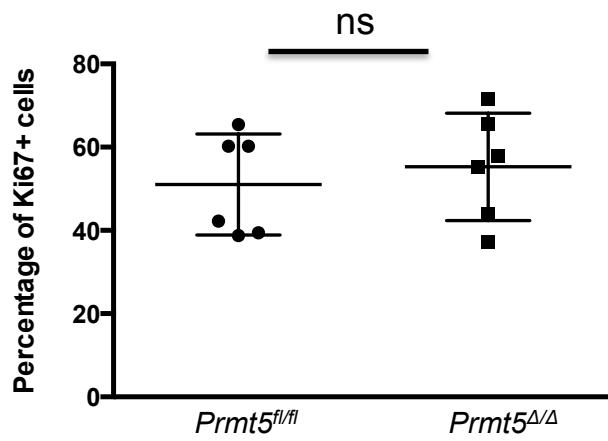

**G**

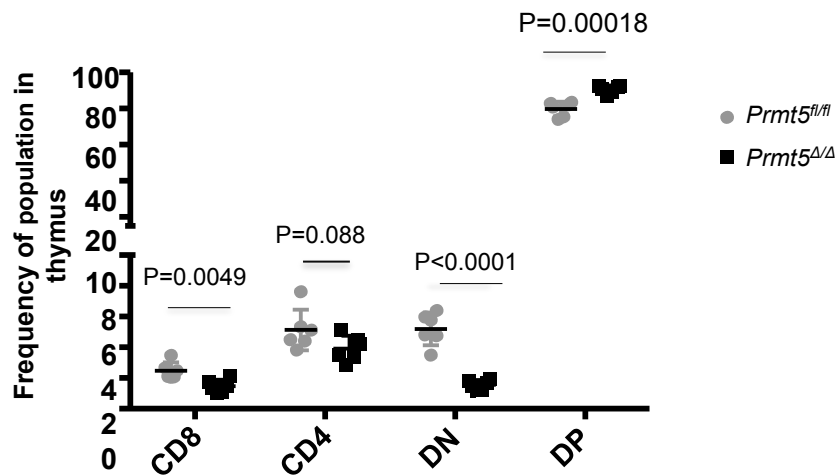

**Figure S3** Myeloid, erythroid, B and T cell development in PRMT5 knockout mice. **A)** BM cells were isolated from day 7 control and PRMT5-deleted mice and cell surface expression of Mac1 and Gr1 was examined by FACS analysis. **B)** The absolute numbers of day 7 Mac1/Gr1 double-positive myeloid cells (left) and Ter119-positive erythroid cells (after red blood cell lysis, right) were calculated based on the frequencies and BM cellularities. P values: student's *t*-test. **C)** Frequencies of CD4, CD8, CD25 and B220-positive cells were determined in day 7 control and *Prmt5* KO spleen cells. P value: student's *t*-test. **D)** B cell development in day 7 BM was determined by cell surface expression of IgM and B220. Frequencies of pro/pre-B cells (IgM<sup>-</sup> and B220<sup>low</sup>), Immature B cells (IgM<sup>-</sup> and B220<sup>high</sup>) and mature B cells (IgM<sup>+</sup> and B220<sup>high</sup>) are plotted. P values: student's *t*-test. **E)** The frequency of CLP was determined in day 7 BM. Purified BM cells were first gated on lin<sup>-</sup>negative population (excluding the CD127 marker), then gated on CD127 and FLT3 double-positive cells, and finally gated on Sca1/c-Kit intermediate cells. Representative FACS plots from 2 independent experiments, with 3 mice per group in each experiment, are shown. **F)** The proliferation of CLP was determined by Ki67 staining (n=6). P value: student's *t*-test. **G)** Thymocytes were isolated from control and PRMT5-null mice 9 days after cre induction. Frequencies of CD4, CD8 single positive, double positive (DP) and double negative (DN) were determined by FACS analysis and plotted here (n=6). P values: student's *t*-test.

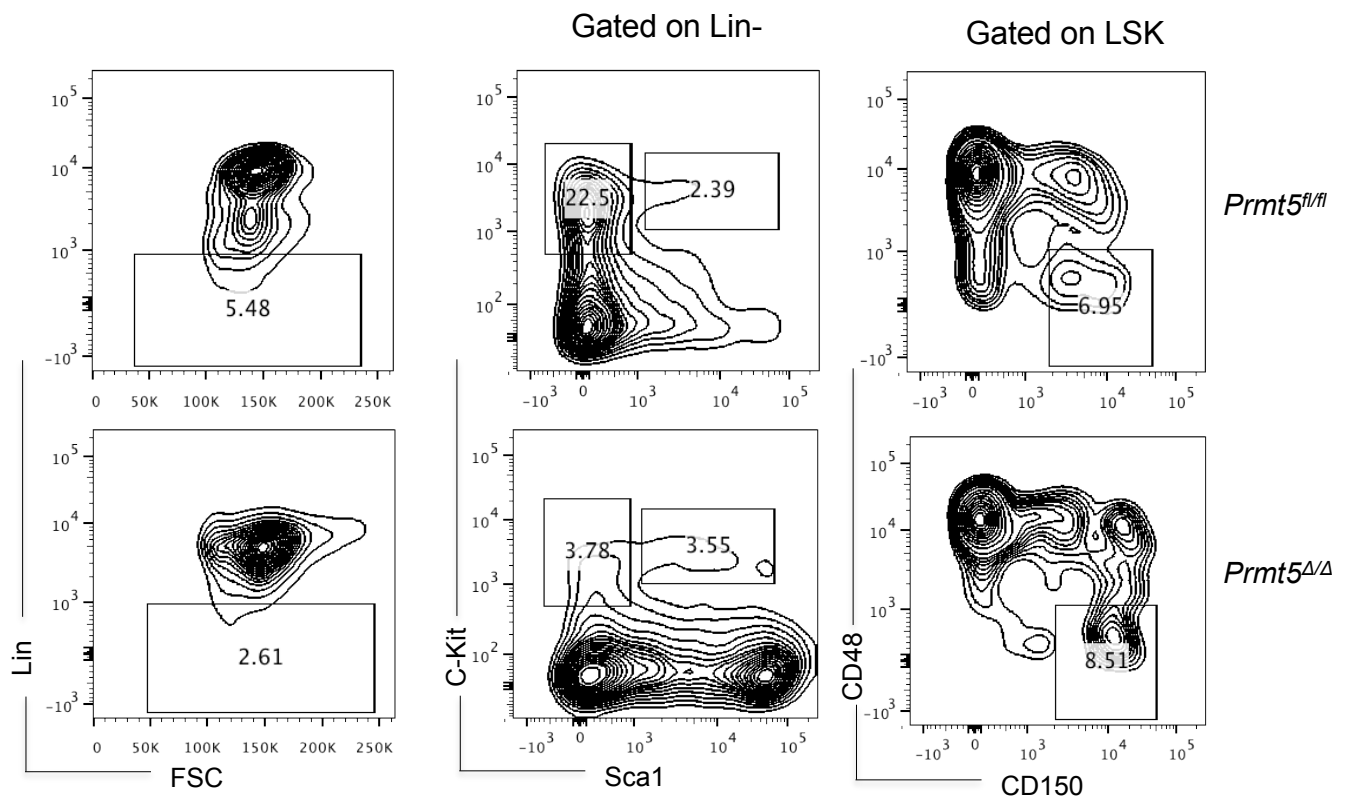

**Figure S4** Loss of hematopoietic stem/progenitor cells (HSPCs) in PRMT5 null mice. BM cells were isolated from control and *Prmt5* knockout mice 9 days after poly (I:C) injection. Frequencies of HSPCs were determined by surface expression of lineage marks, c-Kit, Sca1 and SLAM marks (CD150 and CD48). Representative FACS plots from 5 independent experiments are shown.

**A**

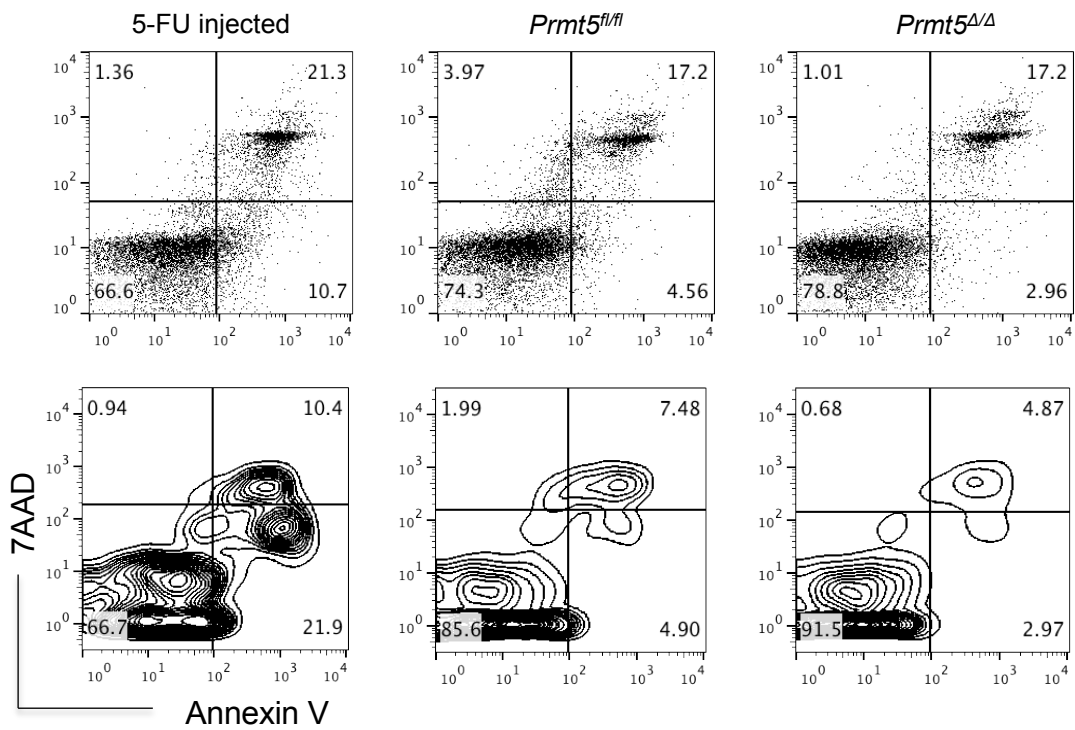

**B**

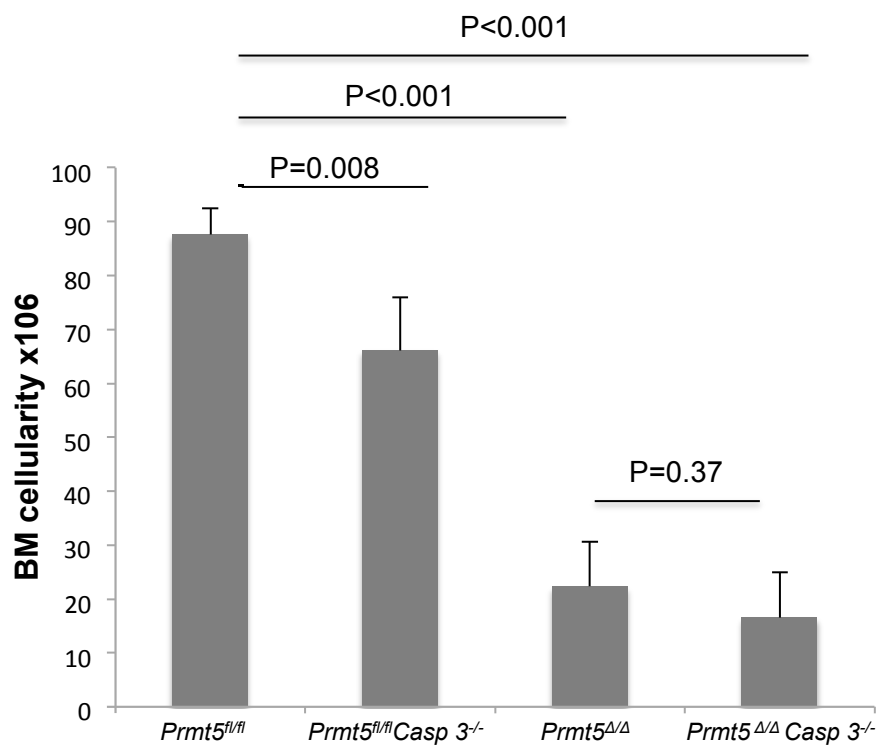



C

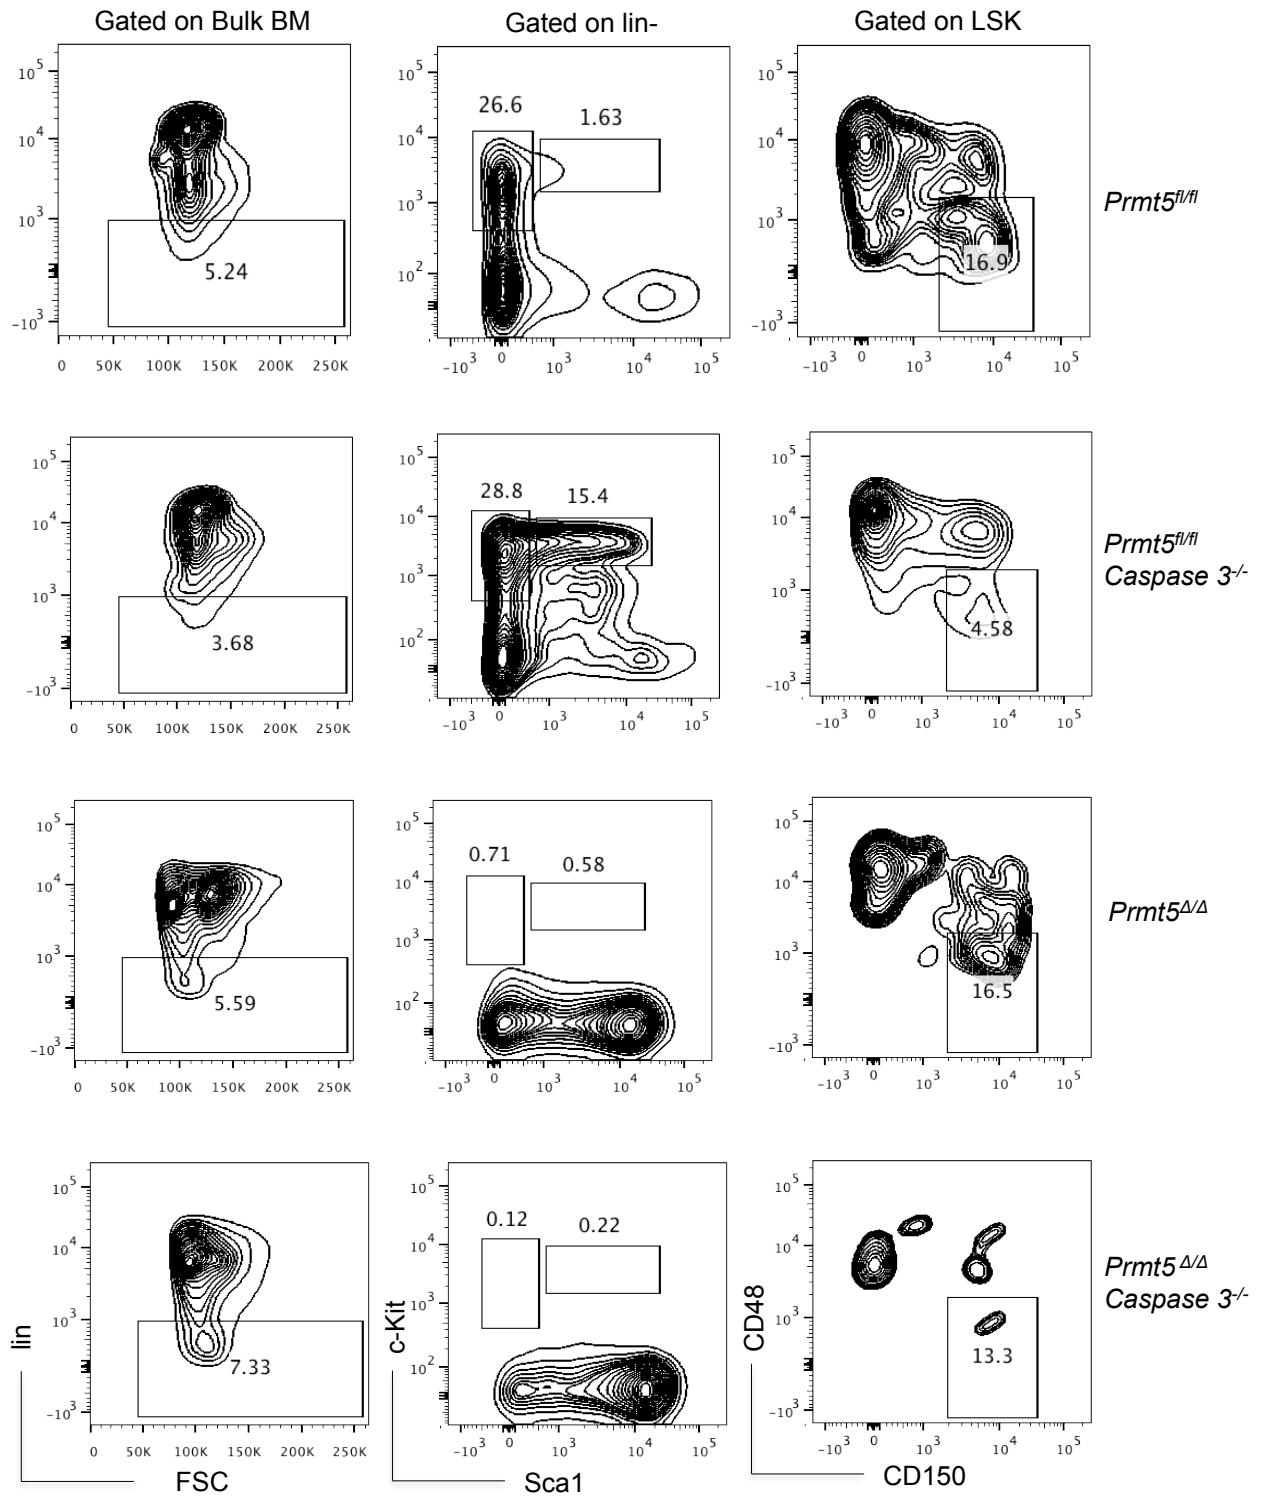

**Figure S5** Apoptosis is not increased in PRMT5-null HSPCs or bulk BM cells. **A)** FACS analysis (with 5 to 6 mice per group) of 7-AAD and Annexin V staining was performed either on  $\text{lin}^+$  BM cells (top) or  $\text{lin}^- \text{c-kit}^+$  stem/progenitor cells (bottom) isolated from day 9 control and PRMT5-deleted mice. BM cells isolated from 5-FU treated mice were used as the positive control. **B)** Cellularity was determined 9 d.p.i. for BM cells isolated from *Prmt5<sup>fl/fl</sup>*, *Prmt5<sup>fl/fl</sup> Caspase3<sup>-/-</sup>*, *Prmt5<sup>Δ/Δ</sup>* and *Prmt5<sup>Δ/Δ</sup> Caspase3<sup>-/-</sup>* mice (n=4). P values: student's *t*-test. **C)** Representative FACS plots from 3 independent experiments show the frequencies of  $\text{lin}^-$ , LK, LSK and LT-HSC cells ( $\text{CD48}^- \text{CD150}^+$  LSK) in *Prmt5<sup>fl/fl</sup>*, *Prmt5<sup>fl/fl</sup> Caspase3<sup>-/-</sup>*, *Prmt5<sup>Δ/Δ</sup>* and *Prmt5<sup>Δ/Δ</sup> Caspase3<sup>-/-</sup>* mice 9 d.p.i.

**A**

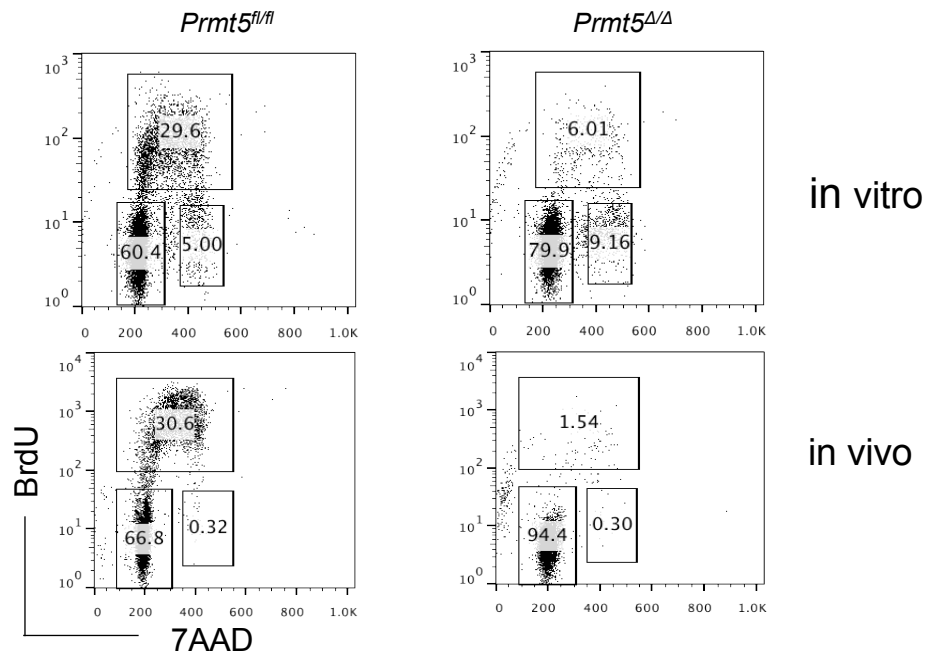

**B**

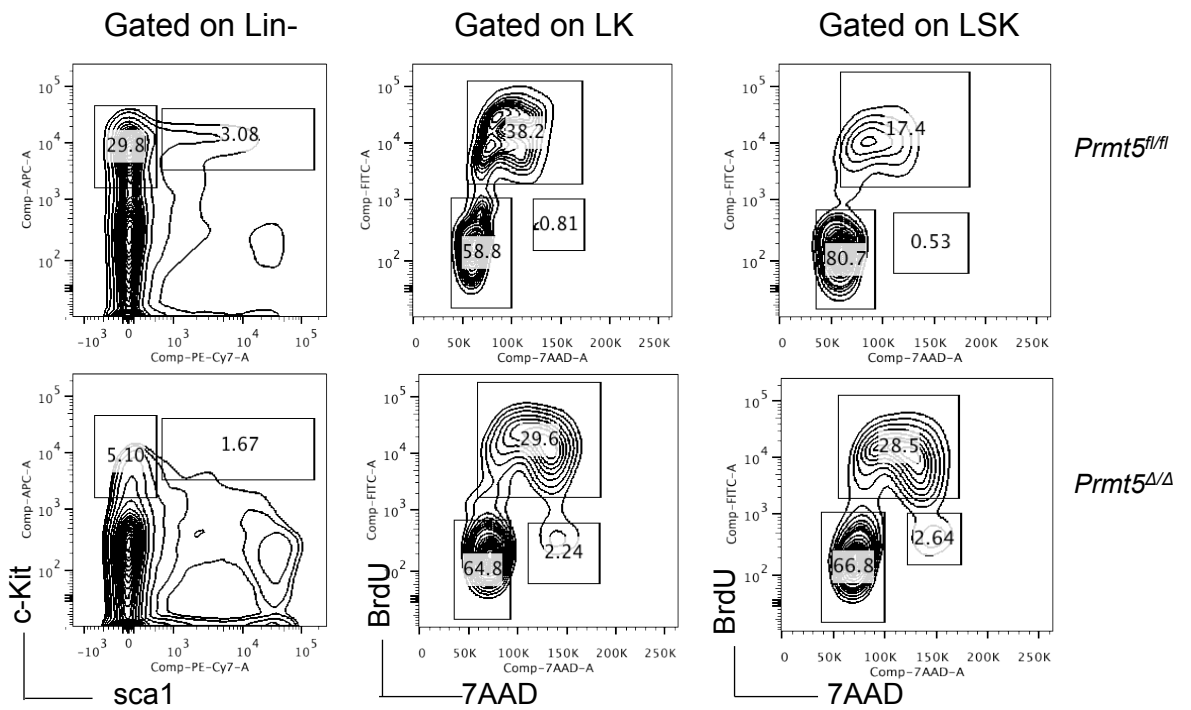

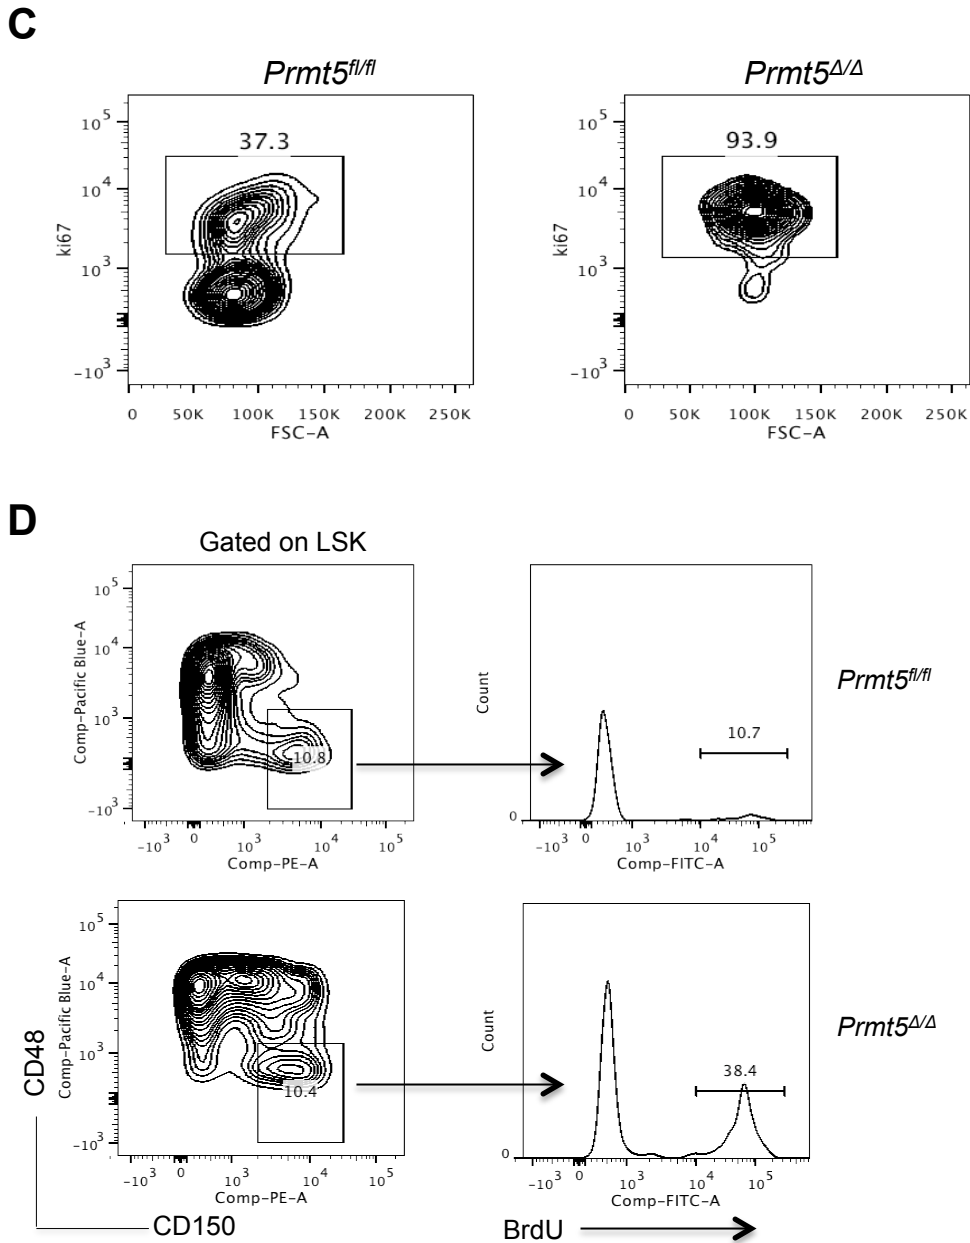

**Figure S6** PRMT5 deletion confers distinct effects on the cell cycle regulation of hematopoietic stem vs. progenitor cells. **A)** BrdU incorporation was measured by FACS analysis in vitro (top) and in vivo (bottom) using BM cells isolated from day 9 control and PRMT5-deleted mice. Representative plots from 3 independent experiments show the flow profile gated on  $lin^-$  cells. **B)** The in vivo BrdU incorporation in day 9 LK and LSK cells was determined by FACS analysis. The gating strategy and frequency of each gate are shown on each representative plot. Two experiments with 2 mice per group in each experiment. **C)** BM cells were isolated from day 9 control and PRMT5-deleted mice and Ki67 expression was determined within the  $CD34^- FLT3^- LSK$  population. Two experiments with 2 mice per group in each experiment. **D)** Representative FACS plots show the increased percentage of BrdU<sup>+</sup> cells in the PRMT5-null LT-HSCs. Two experiments with 3 mice per group in each experiment.

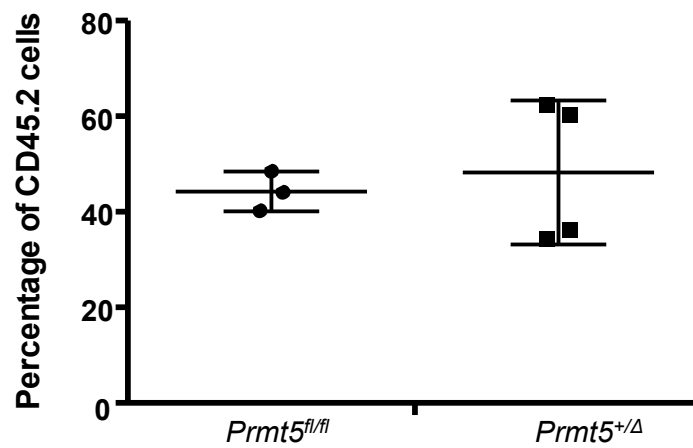

**Figure S7** Heterozygous deletion of *Prmt5* does not affect the repopulating capacity of HSCs. Equal number of CD45.2 BM cells isolated from either *Prmt5<sup>fl/fl</sup>* or *Prmt5<sup>+/-Δ</sup>* mice and wild-type CD45.1 BM cells were transplanted into lethally irradiated recipient mice. PRMT5 deletion was induced by poly(I:C) injection 4-month post transplantation and the percentage of CD45.2 cells in BM was determined by FCAS analysis 14 d.p.i.

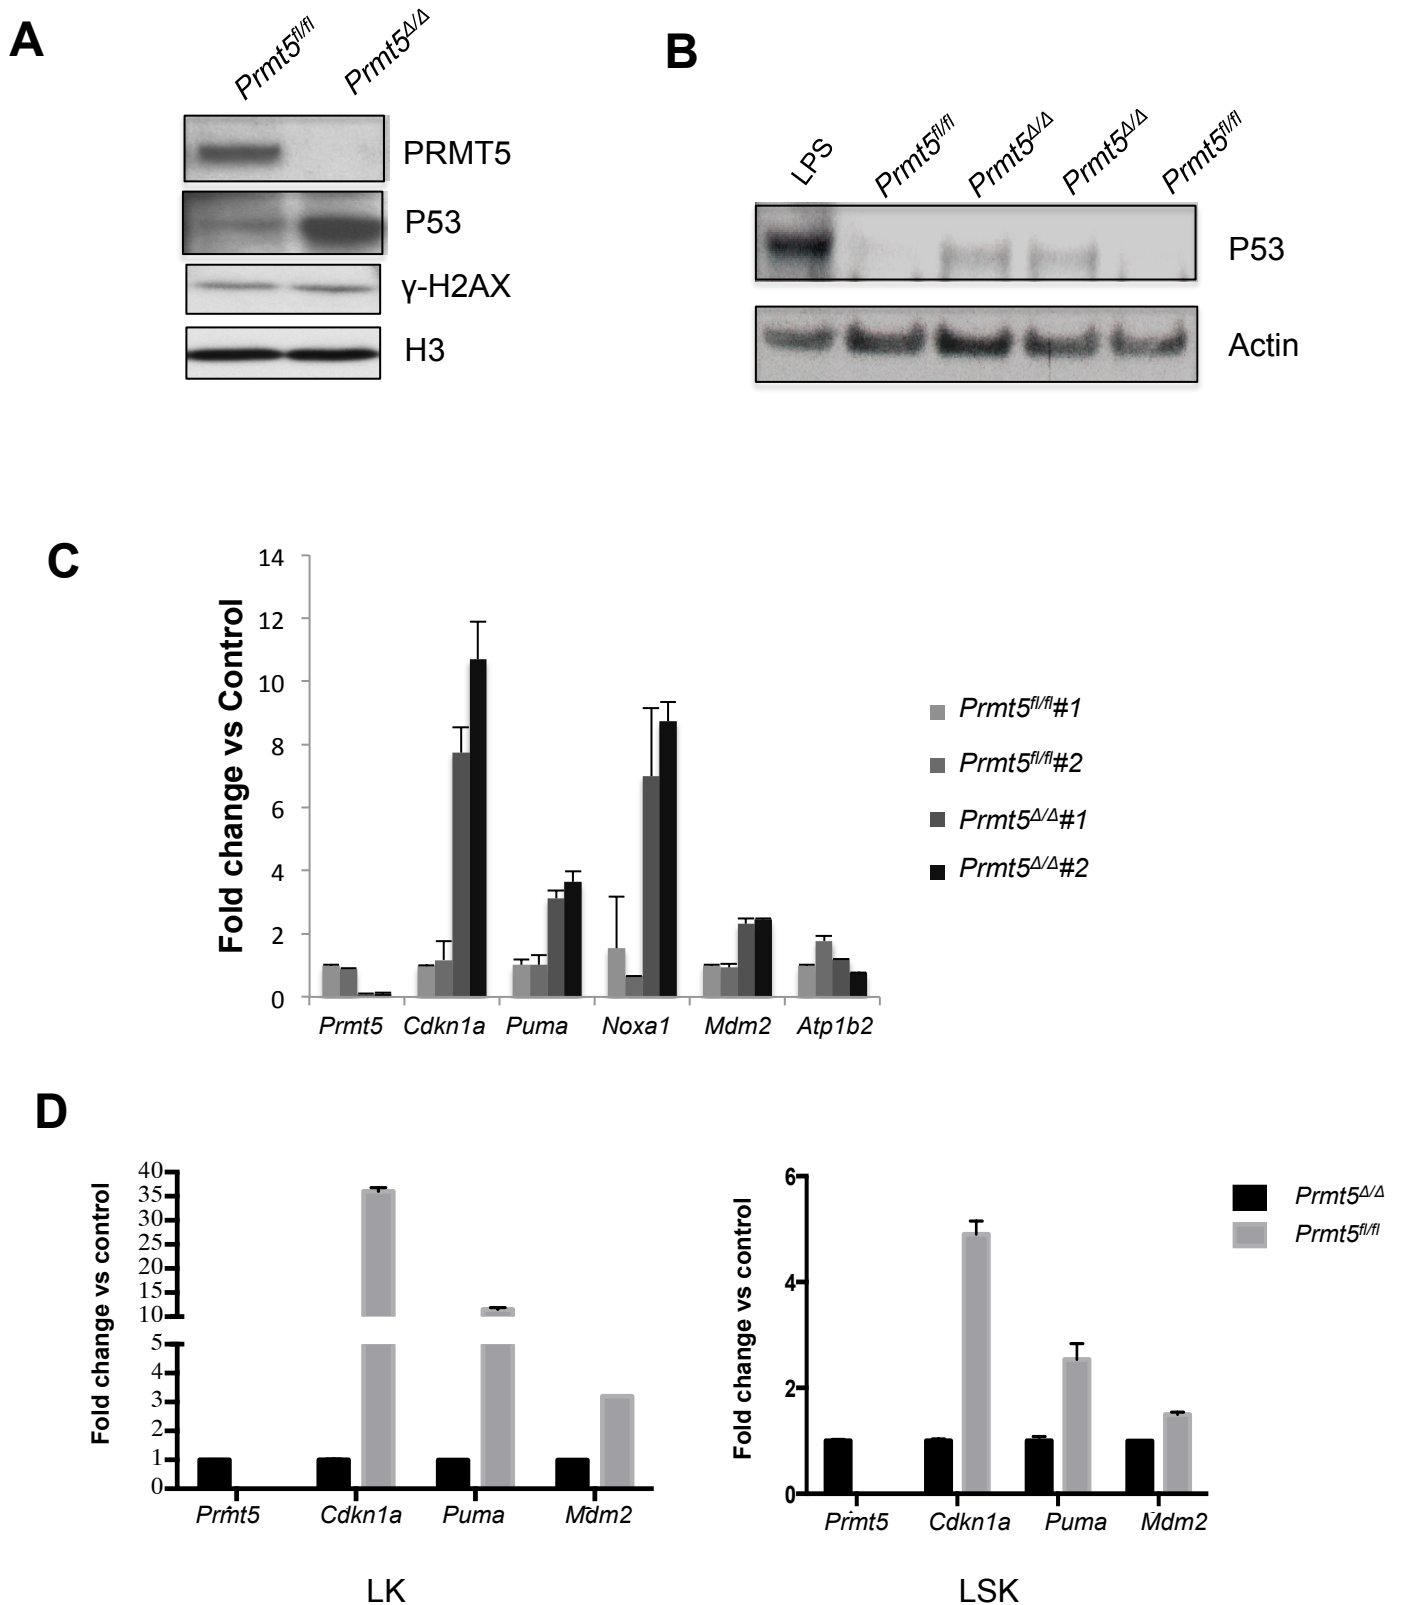

**Figure S8:** Up-regulation of p53 protein and its target genes. **A)** HSPCs were purified from day 7 control and PRMT5-null BM cells using flow cytometry. Blots were probed with antibodies indicated in the figure. **B)** Total BM cells isolated from day 7 control and PRMT5-null mice were lysed and resolved on SDS-page gel. Expression of p53 and  $\beta$ -actin was determined as Figure 6A. BM cells from LPS treated mice were used as positive control for p53 expression. **C)** and **D)** Real-time PCR for p53 target genes in total BM cells (C) or LK and LSK cells (D) isolated from day 7 control and *Prmt5* knockout mice. The representative PCR results from 3 independent experiments are shown.

## **Supplementary Methods:**

### Western blotting and antibodies:

BM or spleen cells were lysed in RIPA buffer supplemented with protease and phosphatase inhibitors (Pierce). The protein samples were separated by electrophoresis on denaturing 10% or 4-12% premade polyacrylamide gels (Invitrogen) and blotted to PVDF membranes (Millipore). The following antibodies used in western blotting were purchased from Cell Signaling Technology: MEP50 (2823s),  $\gamma$ H2AX (9718p), total ERK1/2 (9102s), p-ERK1/2 (4377s); p-STAT5 (9351s), total AKT (4060s), p-AKT (2938p), Caspase 3 (9665s) and symmetric di-methylated arginine (13222s). Antibodies purchased from Santa Cruz are: PRMT5 (sc-22132),  $\beta$ -actin (sc-47778) and total STAT5 (sc-835). The antibody specific for symmetric dimethyl H4R3 was obtained from Epigentek (p-3090-96) and antibody for detecting mouse p53 (CM5) was from Leica Biosystems. All primary antibodies were used at 1:1000 dilutions.

### Real-time PCR

Total RNA was purified using Qiagen RNeasy Mini Kit or Micro Kit (if the cells used for RNA purification are less than  $1 \times 10^5$ ) and was reverse transcribed using the SuperScript III First-strand cDNA Synthesis System (Invitrogen) with random hexamers. Real-time PCR for determining the gene expression levels was performed using the following Taqman probes (Invitrogen): *Prmt5* (Mm01319219-m1), *Cdkn1a* (Mm04205640\_g1), *Bbc3* (Mm00519268\_m1), *Mdm2* (Mm01233136\_m1), *Noxal* (Mm00549172\_m1), *Il-3ra* (Mm00434273\_m1), *c-Kit* (Mm00445212\_m1), *Flt3* (Mm00439016\_m1), *Il-6ra* (Mm00438653\_m1) and *Hprt1* (Mm01545399\_m1).

To measure intron retention in the *Flt3*, *c-Kit* and *Il-6ra* mRNA, we designed PCR primers flanking each exon-intron junction (intron PCR) to detect the un-spliced introns, and normalized these intron PCR results to total mRNA levels (using PCR primers within one exon). All PCR reactions were performed using total RNA pre-treated with DNase I, to eliminate residual genomic DNA.

Cell surface markers for HSC and their differentiated progeny (in Figure 1A):

To purify cells used for PCR in Figure 1A, the myeloid progenitor cells (LK cells) and stem cell-enriched LSK population was defined by cell surface expression of Lineage markers (Ter119, B220, Mac1, Gr1, CD3e, CD4, CD5, CD8 and CD127), c-Kit and Sca1. LK cells are Lineage<sup>-</sup>, c-Kit<sup>+</sup> and Sca1<sup>-</sup>, and LSK cells are Lineage<sup>-</sup>, c-Kit<sup>+</sup> and Sca1<sup>+</sup> cells. Within the LSK population, the cell surface expression of FLT3 and CD34 was used to further define the sub-populations. LT-HSCs are CD34<sup>-</sup> FLT3<sup>-</sup> LSK; ST-HSCs are CD34<sup>+</sup> FLT3<sup>-</sup> LSK cells; MPP cells are CD34<sup>+</sup> FLT3<sup>+</sup> LSK cells. Within the LK population, CD34 and FcR2/3 markers were used to further define the sub-populations. CMP cells are CD34<sup>+</sup> and FcR2/3<sup>-</sup> LK cells; GMP cells are CD34<sup>+</sup> and FcR2/3<sup>+</sup> LK cells; and MEP cells are CD34<sup>-</sup> and FcR2/3<sup>-</sup> LK cells.

Within the differentiated cells, myeloid cells are the Mac1 and Gr1 double-positive cells, erythroid cells are Ter119<sup>+</sup> cells, and B cells are B220<sup>+</sup> cells.

In vivo BrdU incorporation assay:

Bromodeoxyuridine (BrdU, BD Pharmingen) was given to mice by intraperitoneal injection at 150mg/kg. BM cells were isolated 90 min post-injection and stained for cell surface markers of HSCs (SLAM LSK or CD34<sup>-</sup> FLT3<sup>-</sup> LSK). Incorporated BrdU was



then detected using the FITC BrdU Flow Kit (BD Pharmingen) according to the manufacturer's instructions, and subjected to FACS analysis.
